# Supplementary material
Source: PubMed Central journal article supplement (PMC7351029)

translation efficiency  
TrIP-seq reads (polysome / total cytoplasmic)

6 -  
4 -  
2 -  
0 -

80S

poly2

poly3

poly4

poly5

poly6

poly7

poly8

EMATS  
TSS

control  
TSS

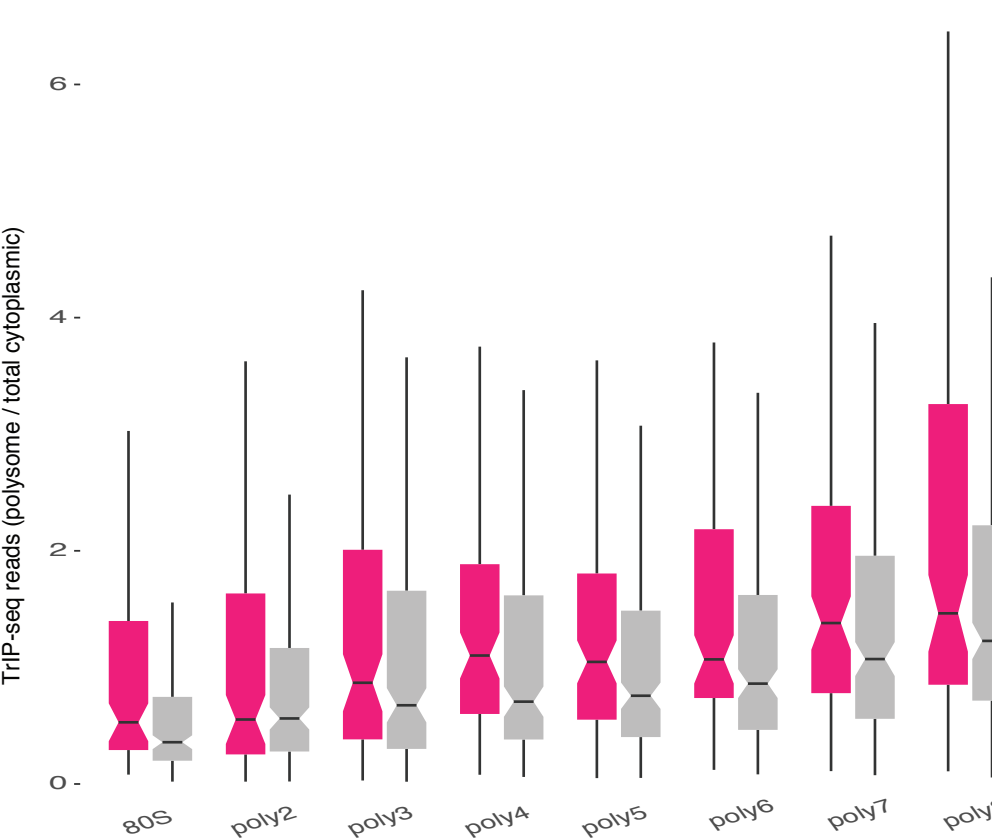

Supplement: NIHMS1545812-supplement-7.pdf [file NIHMS1545812-supplement-7.pdf]
