# Supplementary material
Source: PubMed Central journal article supplement (PMC7351029)
Supplement: NIHMS1545812-supplement-10.pdf [file NIHMS1545812-supplement-10.pdf]

**Table S4. Related to Figure 5**

| mouse SE, TSS       |                    |        |                      |                    |      |
|---------------------|--------------------|--------|----------------------|--------------------|------|
|                     | SE $\psi$ > median |        | TSS $\psi$ < median  |                    |      |
|                     |                    |        | TSS located upstream |                    |      |
|                     |                    |        |                      | TSS < 2kb upstream |      |
| no. of SE           | 49488              | 24744  | 13237                | 9621               | 3333 |
| no. of TSS          | 58095              | 37266  | 18633                | 9510               | 2991 |
| no. of SE-TSS pairs | 223568             | 103801 | 42528                | 21326              | 4284 |
| no. of genes        | 13491              | 9363   | 4973                 | 3833               | 1777 |

Column A shows the number of SE expressed in the nine tissues sequenced in mouse and the number of genes in which they are distributed. Column B shows the number of these SE in which the average of PSI values across tissues is above the median of all SE and column C the TSS paired with those SE with an average PSI across tissues below the median. Columns D and E reflect the subset of SE-TSS pairs and genes from previous columns in which the TSS is located upstream or proximal and upstream of the SE.
