# Supplementary material
Source: PubMed Central journal article supplement (PMC7351029)

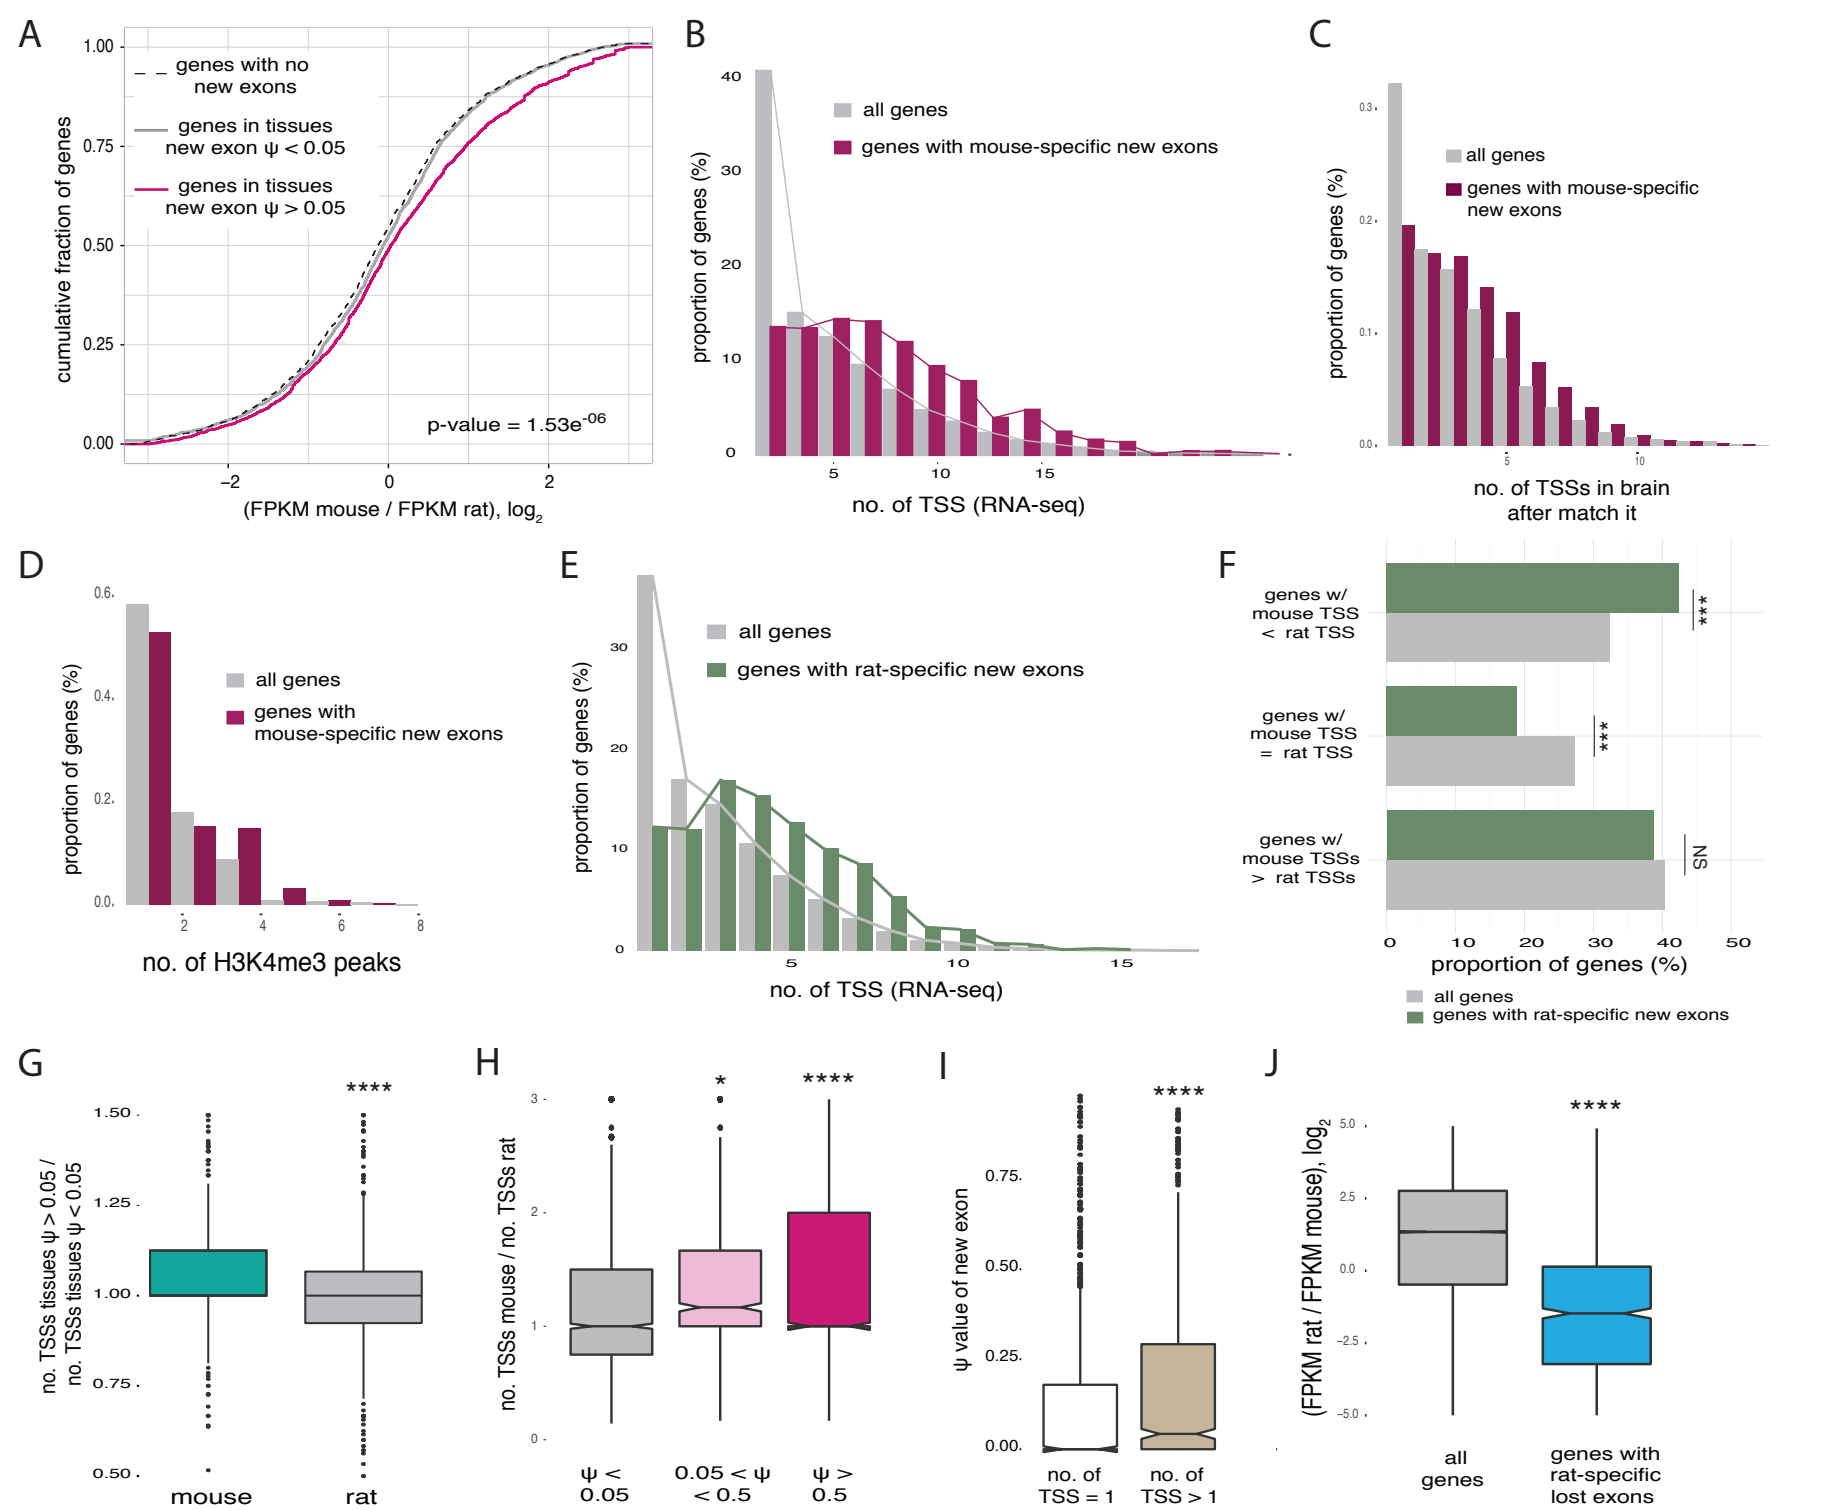

Supplement: NIHMS1545812-supplement-1.pdf [file NIHMS1545812-supplement-1.pdf]

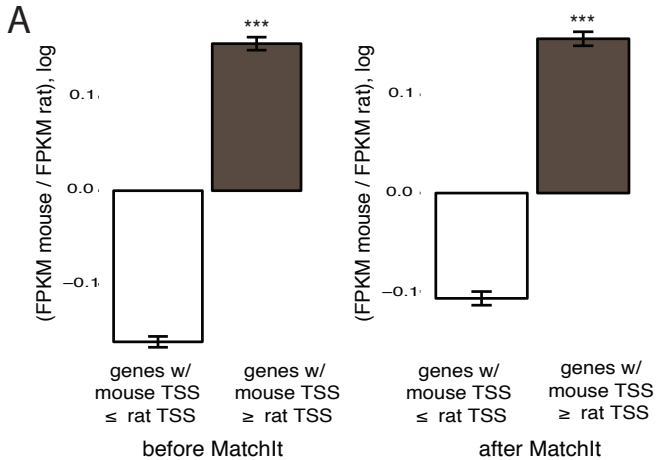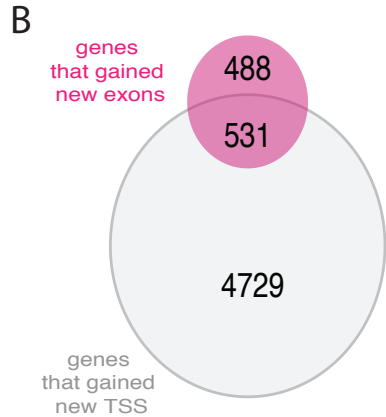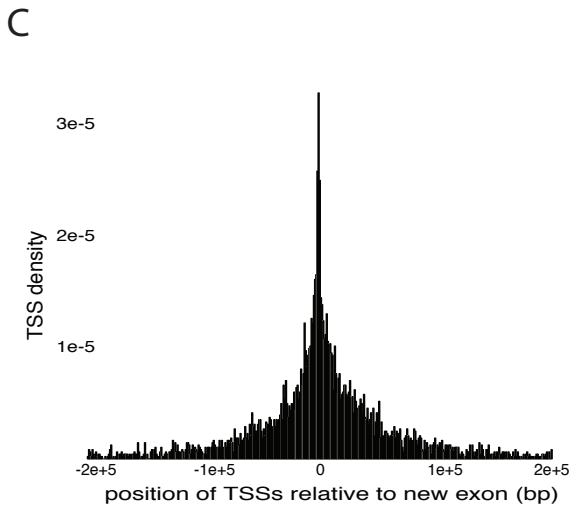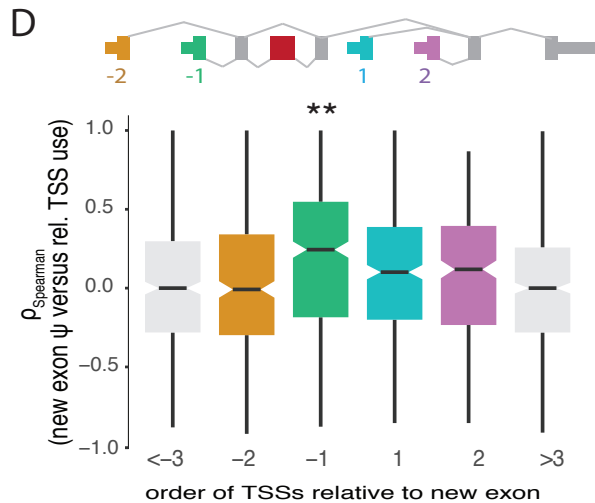

Supplement: NIHMS1545812-supplement-2.pdf [file NIHMS1545812-supplement-2.pdf]

**A**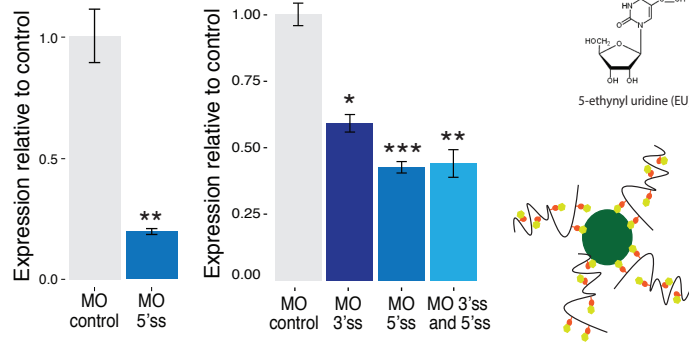**B**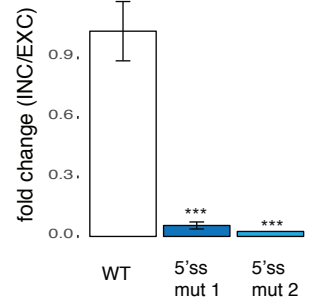**C**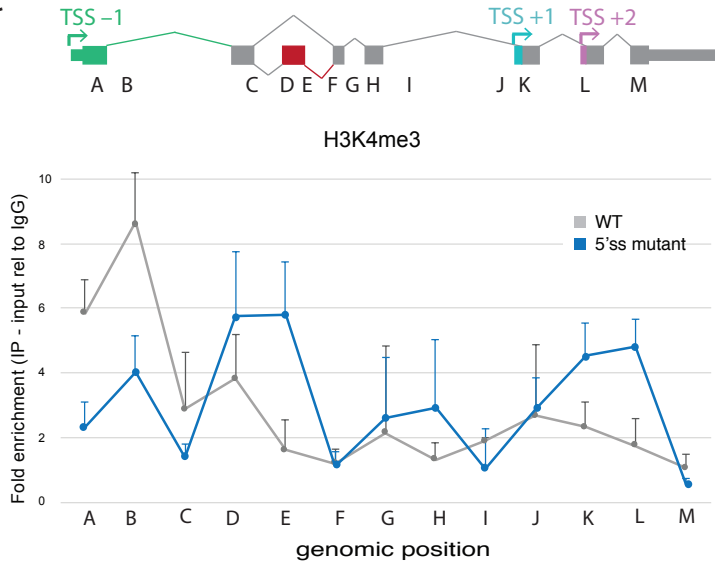**D**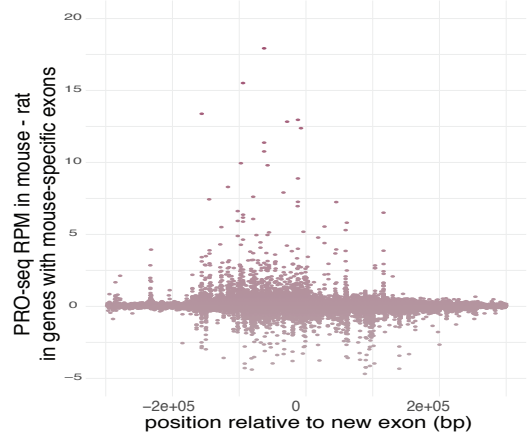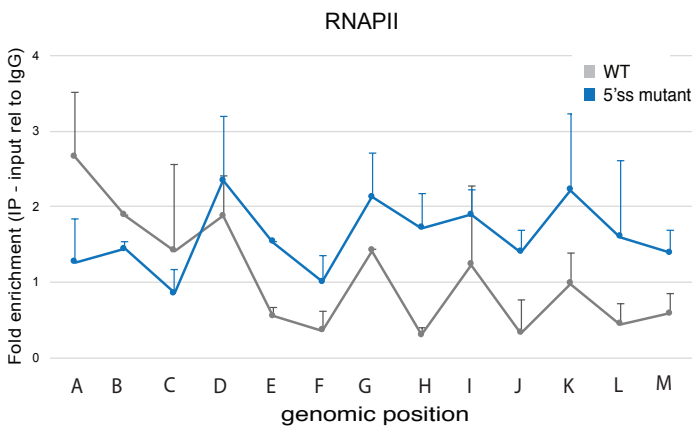**E**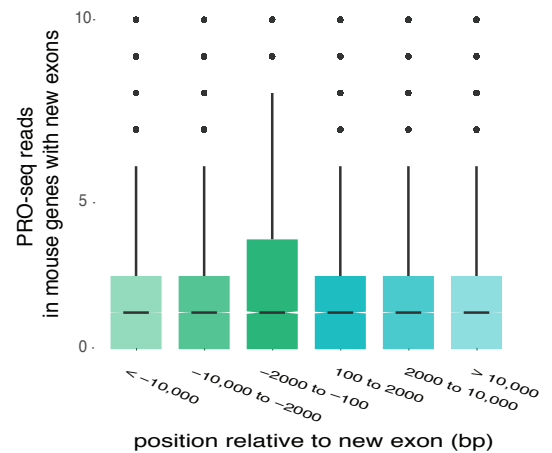**F**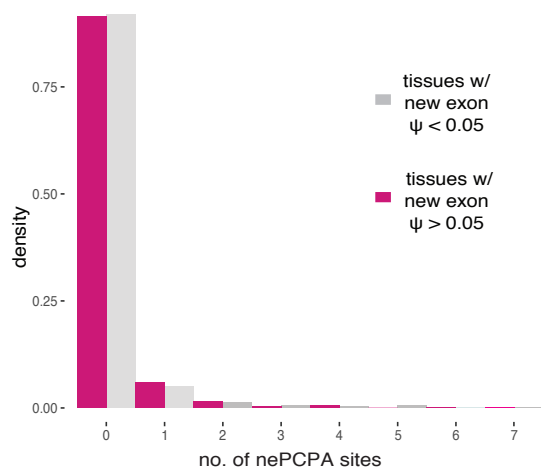**G**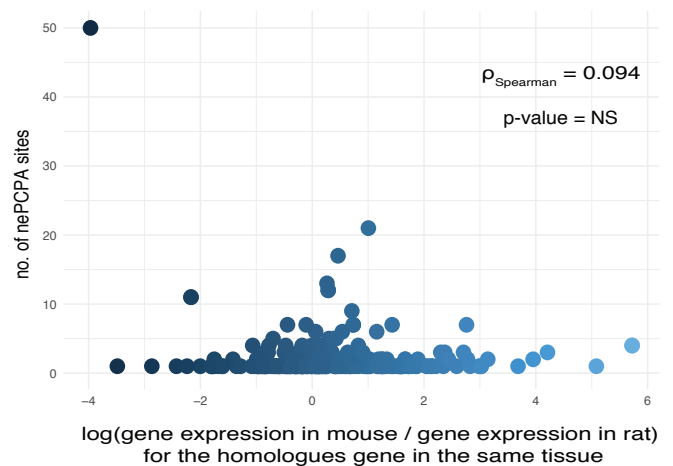

Supplement: NIHMS1545812-supplement-3.pdf [file NIHMS1545812-supplement-3.pdf]

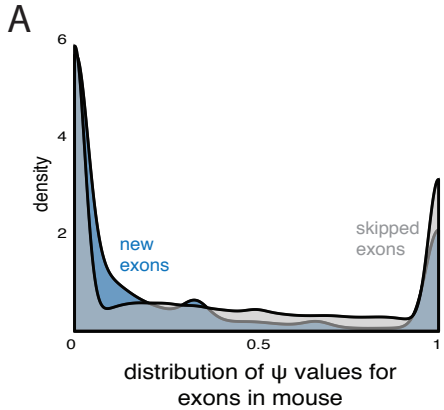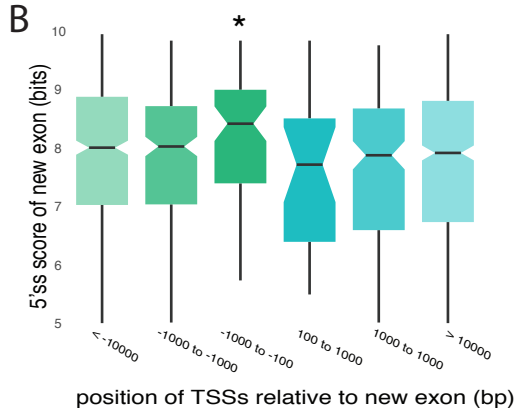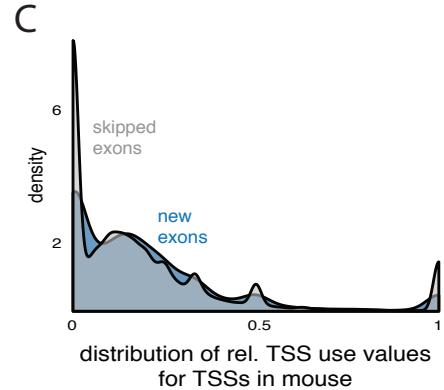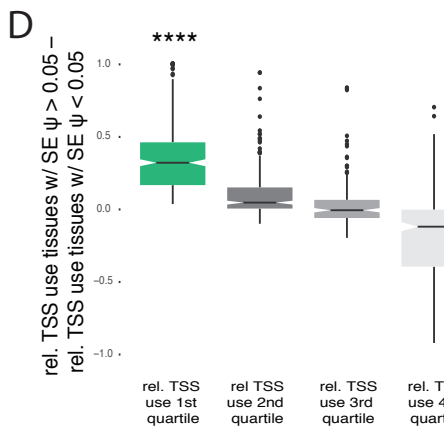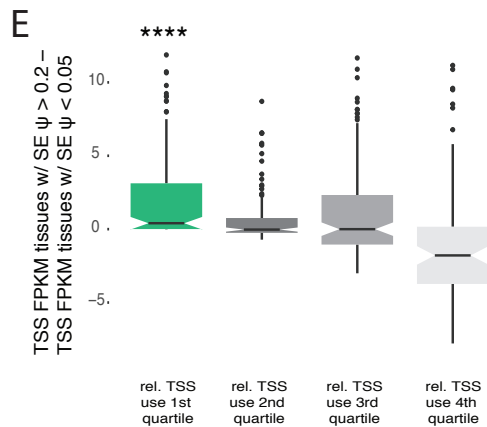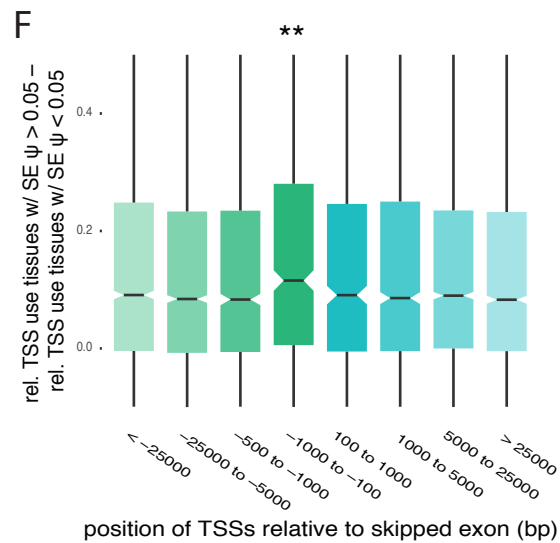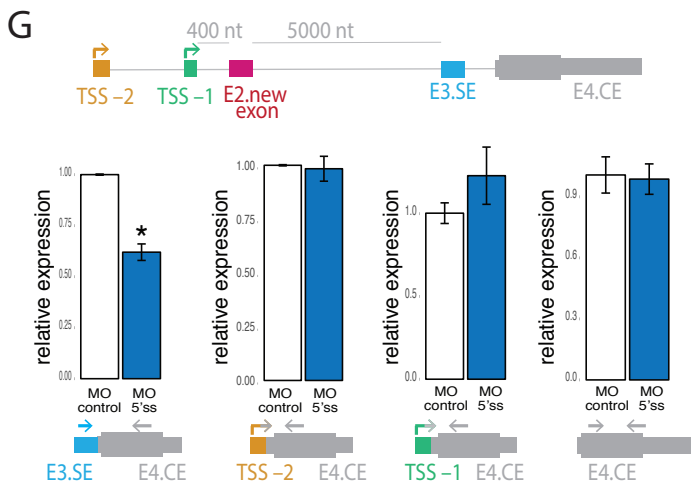

Supplement: NIHMS1545812-supplement-5.pdf [file NIHMS1545812-supplement-5.pdf]

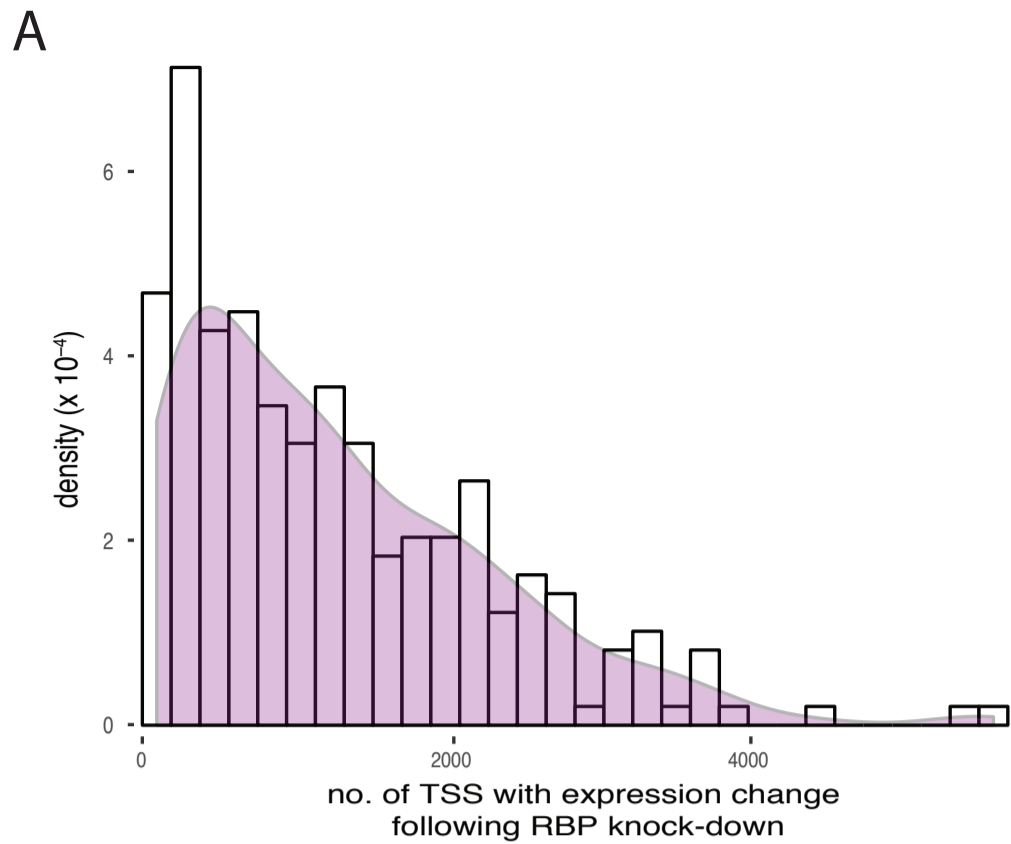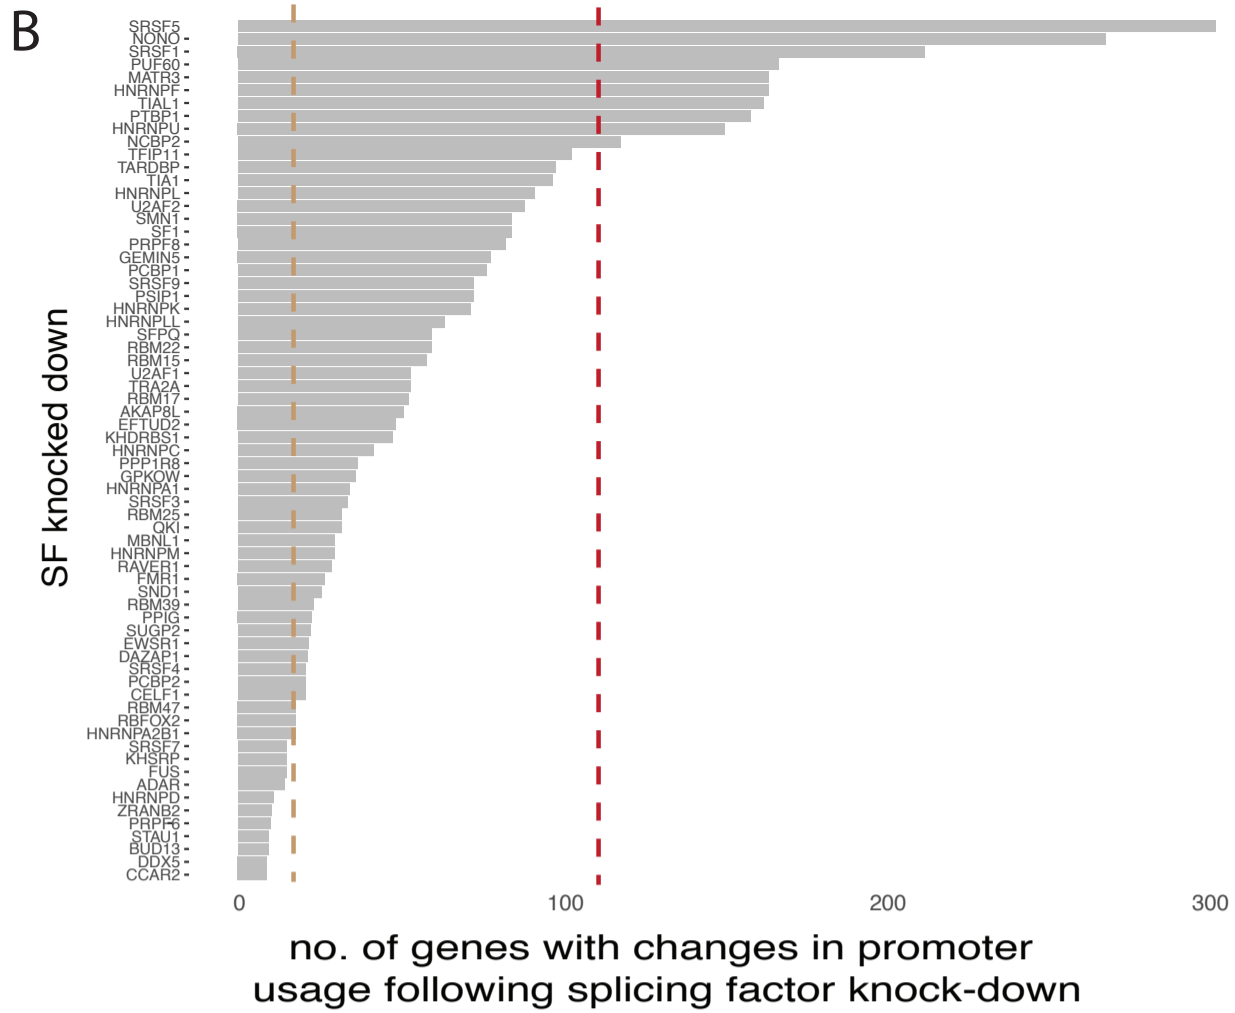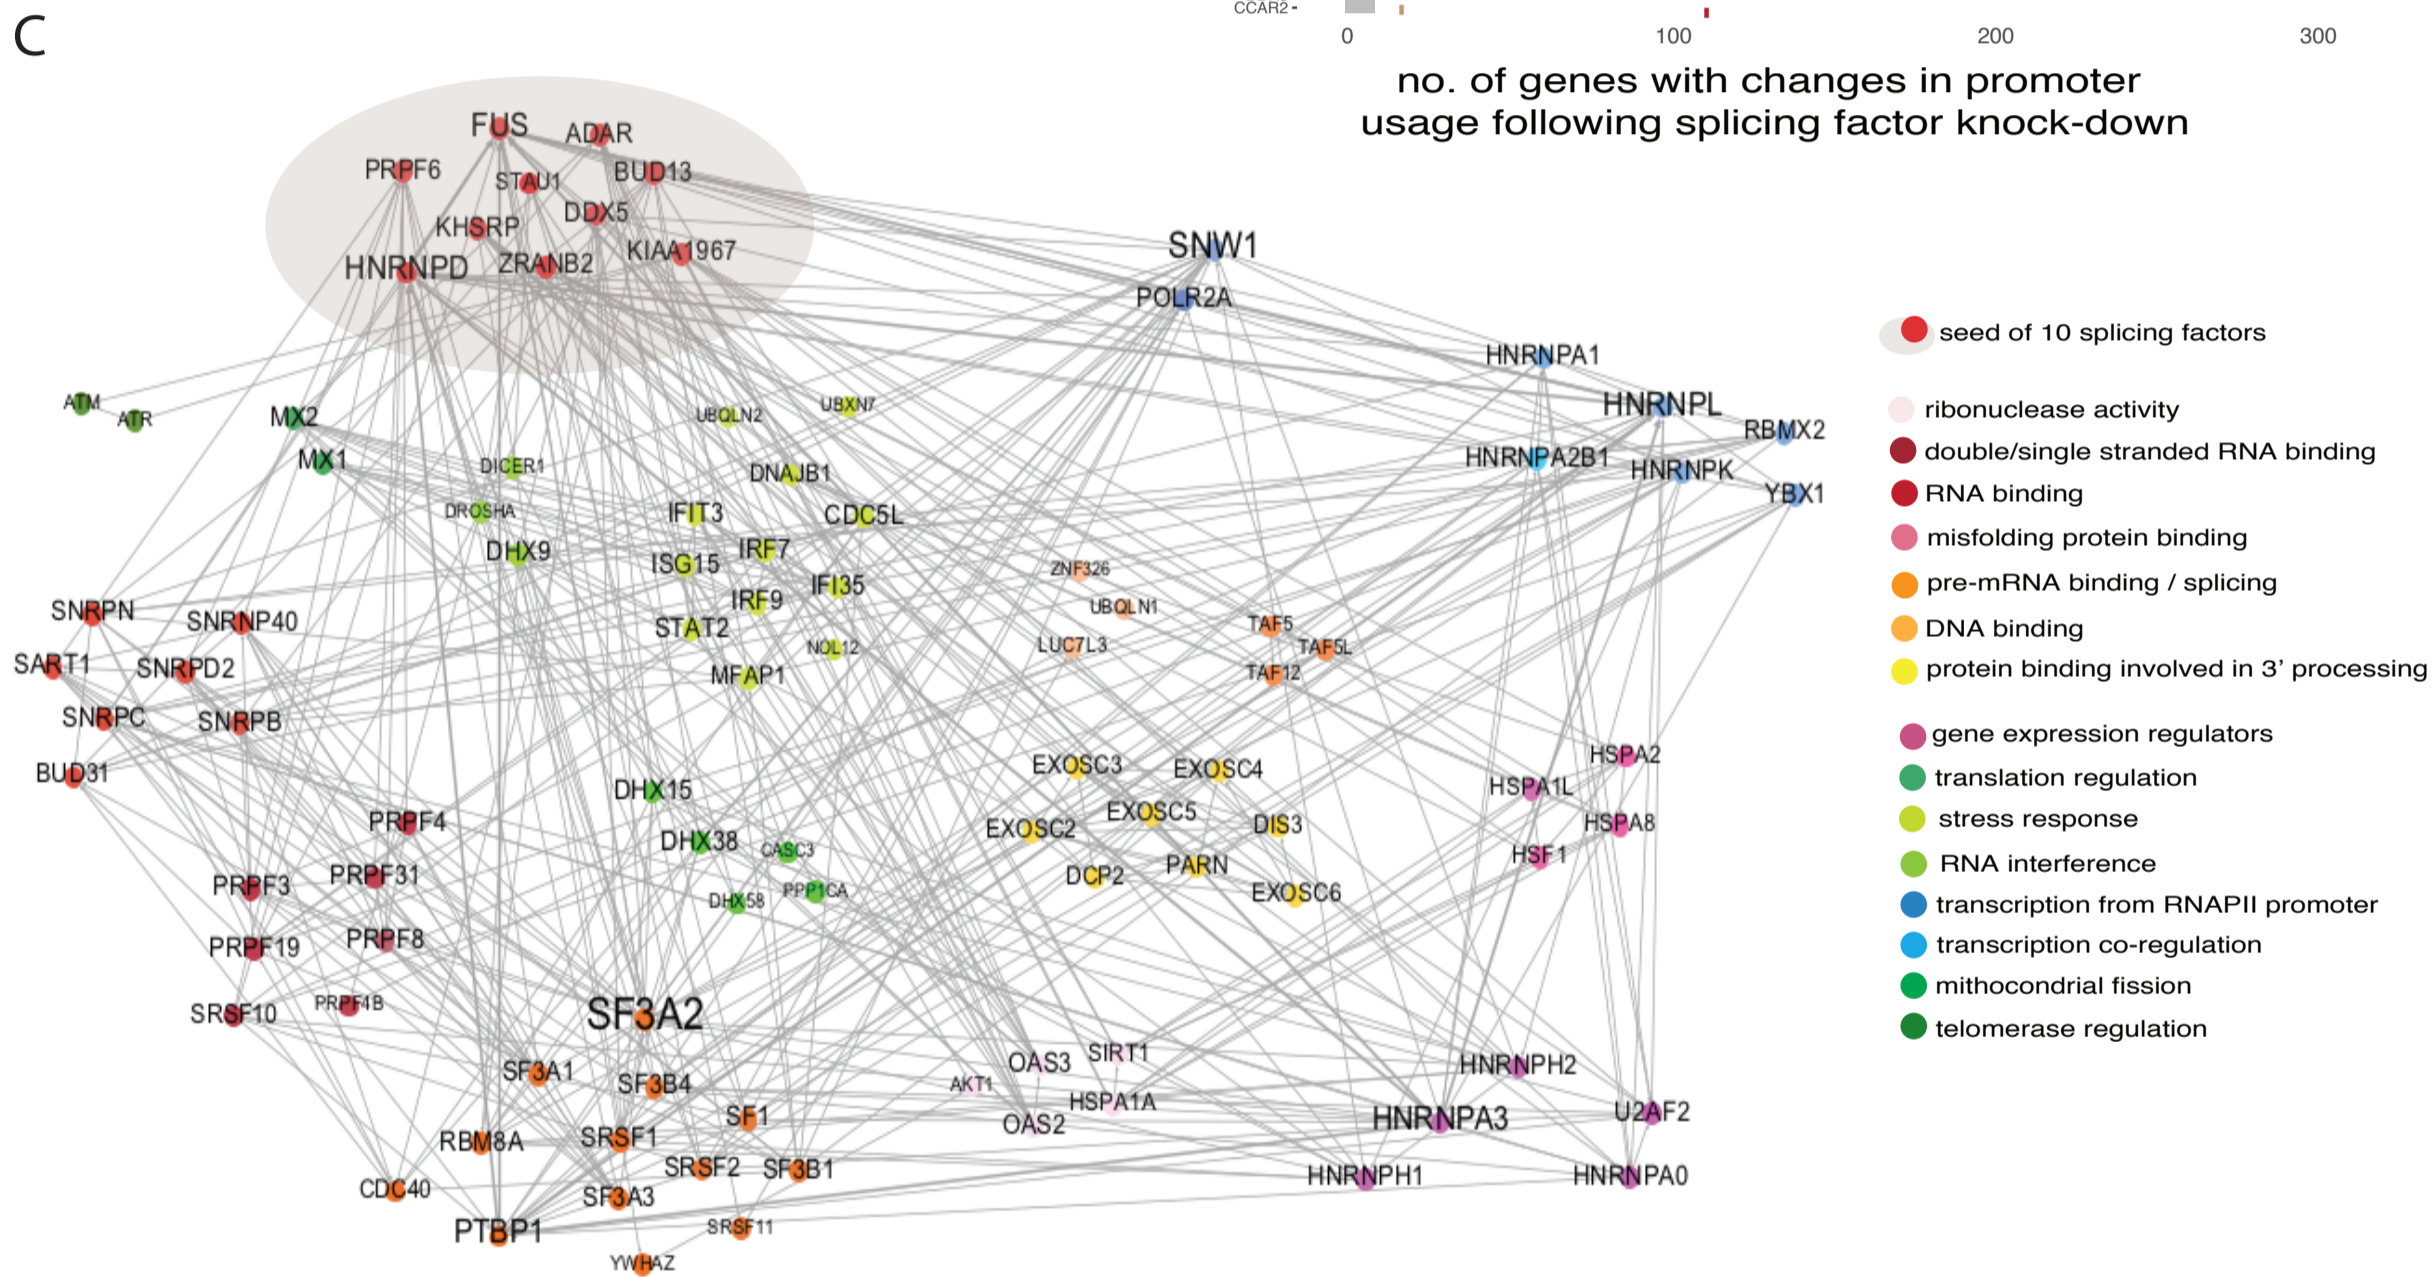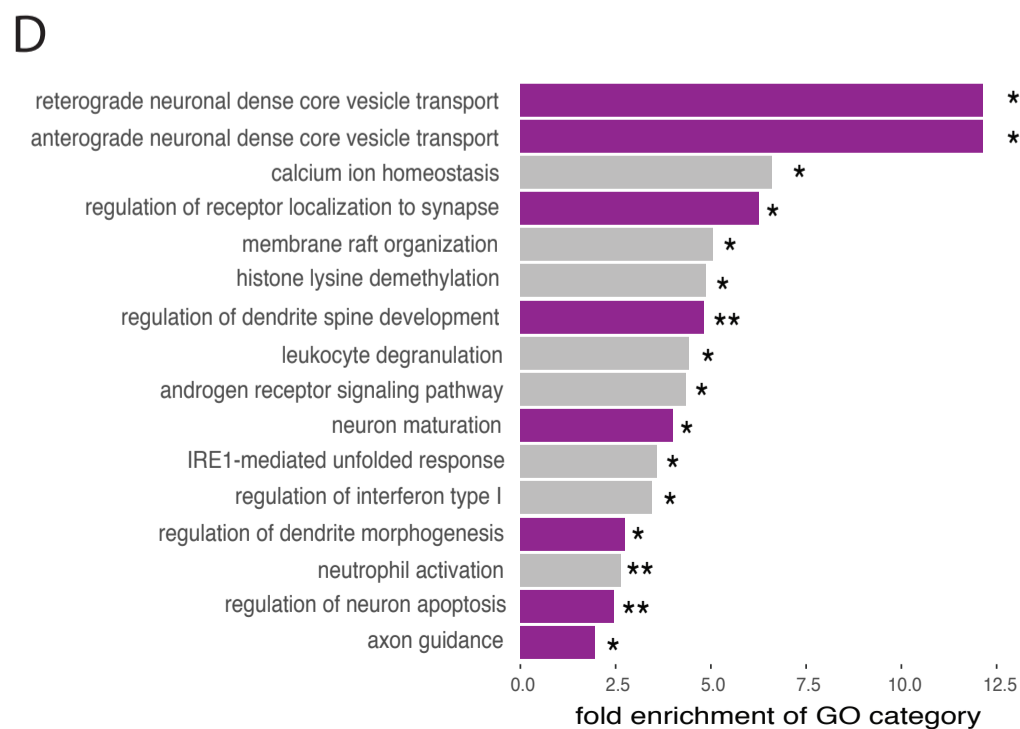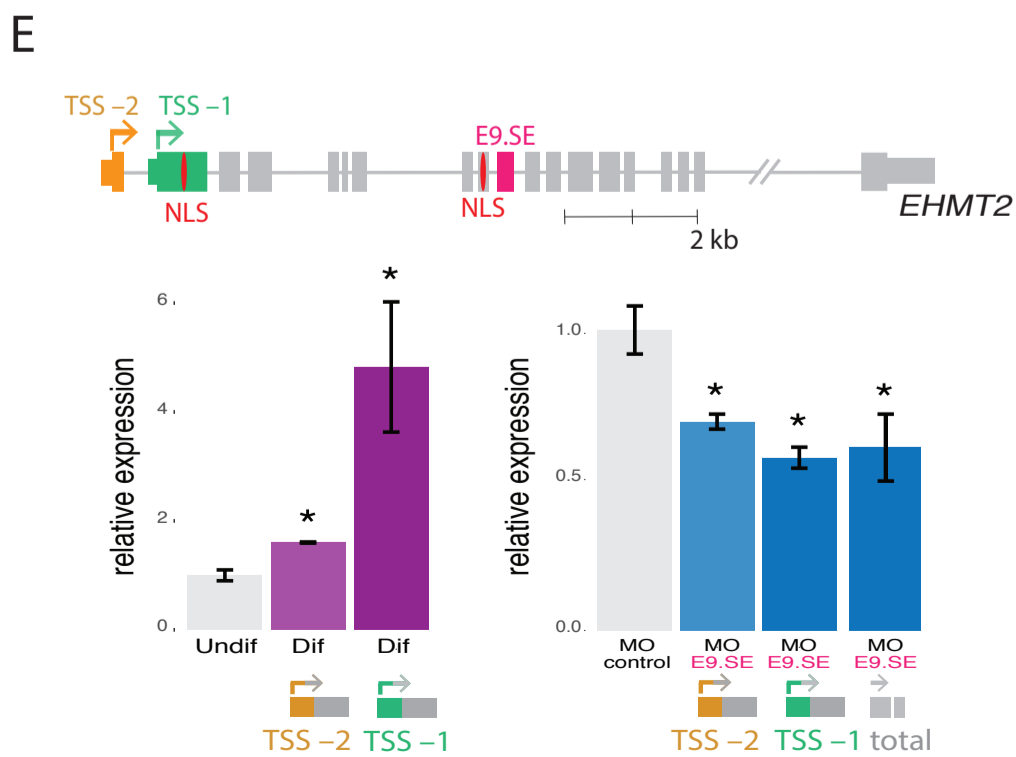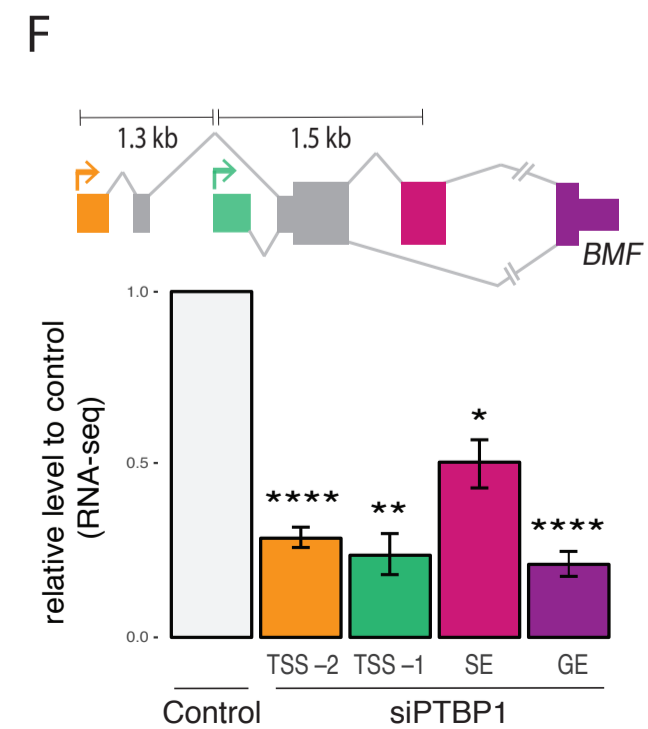

Supplement: NIHMS1545812-supplement-6.pdf [file NIHMS1545812-supplement-6.pdf]
